# Supplementary material
Source: Springer Nature journal article supplement (https://www.springermedizin.de/resource/supplementary/12960_2003_3_MOESM2_ESM.pdf/9569764)
Supplement: MOESM2 [file 9569764]

## Inputs

- Financial resources
- **Human resources**
- Capital stocks
- Consumables
- Information, knowledge

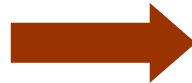

## Functions

- Financing
- Stewardship
- **Services provision**
- **Resources generation**

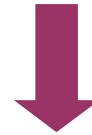

## Goals

- Average level of health
- Health inequalities
- Responsiveness
- Fair financial contributions

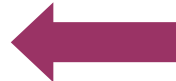

## Intermediate goal

- Effective coverage
